# Supplementary material
Source: PubMed Central journal article supplement (PMC7596685)
Supplement: jamaoncol-e203161-s003.pdf [file jamaoncol-e203161-s003.pdf]

## **Data Sharing Statement**

Cloughesy. Effect of Vocimagene Amiretrorepvec in Combination With Flucytosine vs Standard of Care on Survival Following Tumor Resection in Patients With Recurrent High Grade Glioma. *JAMA Oncol.* Published October 29, 2020. 10.1001/jamaoncol.2020.3161

### **Data**

**Data available:** No
